# Supplementary material for: Postmortale molekulargenetische Untersuchungen (molekulare Autopsie) bei kardiovaskulären und bei ungeklärten Todesfällen
Source: Springer Nature journal article supplement (doi:10.1007/s12181-020-00438-5), 2021-02-24
Supplement: 12181_2020_438_MOESM1_ESM.docx [file 12181_2020_438_MOESM1_ESM.docx]

**Zusatzmaterial**

**Electronic Supplementary Material (ESM)**

**Zusätzliche Tabelle 1: Ursachen und Häufigkeit plötzlicher Todesfälle beim Sport**

(modifiziert nach(Oliva et al., 2017))

| **Todesursache** | **Relativer  Anteil** | **Referenz** |
| --- | --- | --- |
| SADS (Nicht wegweisende bzw.  unauffällige Autopsie) | 29%  35%  2%  42% | (de Noronha et al., 2009)  (Eckart et al., 2004)  (Corrado et al., 2006)  (Finocchiaro et al., 2016) |
| SADS  (Molekulare Autopsie mit Mutationsnachweis) | 54%  13% | (Campuzano et al., 2017)  (Lahrouchi et al., 2017) |
| Myokarditis | 3%  20%  10% | (de Noronha et al., 2009)  (Eckart et al., 2004)  (Corrado et al., 2006) |
| Koronaranomalie  Koronarerkrankungen (KHK) | 3%  14%  61%  17 - 33%  20%  5% | (de Noronha et al., 2009)  (Corrado et al., 2006)  (Eckart et al., 2004)  (Maron et al., 2016)  (Corrado et al., 2006)  (Finocchiaro et al., 2016) |
| Hypertrophe Kardiomyopathie (HCM)    Hypertrophe Kardiomyopathie, Linksventrikuläre Hypertrophie (HCM, LVH) | 13%  36 - 39%  13%  6%  37% | (Eckart et al., 2004)  (Maron et al., 2016)  (Corrado et al., 2006)  (Finocchiaro et al., 2016)   (de Noronha et al., 2009) |
| Arrhythmogene, rechtsventrikuläre Kardiomyopathie  (ARVC) | 10%  4 - 13%  24%  13% | (de Noronha et al., 2009)  (Maron et al., 2016)  (Corrado et al., 2006)  (Finocchiaro et al., 2016) |
| Langes QT-Syndrom  (LQTS) | 2 - 7% | (Maron et al., 2016) |
| Erregungsleitungsstörungen | 8% | (Corrado et al., 2006) |
| Mitralklappenprolaps  (MVP) | 12% | (Corrado et al., 2006) |
| Unspezifische Fibrose  Fibrose +/- LVH | 5 - 10%  16% | (Maron et al., 2016)  (Finocchiaro et al., 2016) |
| **Studienpopulationen:**  Autopsiestudie, Athleten (n=113) (de Noronha et al., 2009)  Autopsiestudie, Militärrekruiten (n=89) (Eckart et al., 2004) Autopsiestudie, Athleten (n=842) (Maron et al., 2016) Molekulare Autopsie, Tod während des Sports (n=52) (Campuzano et al., 2017)  Autopsiestudie, prospektiv, Athleten (n=55) (Corrado et al., 2006)  Autopsiestudie, retrospektiv (n=357) (Finocchiaro et al., 2016) | | |

**Zusätzliche Tabelle 2: Empfehlungen für eine retrospektive Anamneseerhebung bei**

**einem ungeklärten Todesfall unter 40 Jahren**

(modifiziert nach (Al-Khatib et al., 2018; Priori et al., 2015))

|  |  | **Kommentar** |
| --- | --- | --- |
| **Allgemein** | Persönliche Daten | Sterbealter, Geschlecht  Beruf, Lebensstil (BMI, Sportliche Aktivität, Alkohol, Drogen/Kokain, Amphetamin, Anabolika, Nikotin, Medikamente) |
| **Todesumstände** | Außerhalb eines Krankenhauses | Todesumstände, Symptome unmittelbar und im Weiteren vor dem Tod, Todesort, Zeitpunkt, Todesdauer, unbeobachtet / beobachtet, Begleitumstände |
| Innerhalb eines Krankenhauses | Todesumstände, Symptome unmittelbar und im Weiteren vor dem Tod, Todesort, Zeitpunkt, Todesdauer, unbeobachtet / beobachtet, Begleitumstände  Eingeleitete Maßnahmen und Befunde, Medikation |
| Notfallprotokolle bzw. Ärztliche/Pflegerische Dokumentation | - Befunde, z.B. EKGs, Rhythmusdokumentation, Interventionen, Medikationen (Zeitpunkt, Dosis), Serum-enzyme, Elektrolyte, Troponin, D-Dimer, etc. |
| **Anamnese** |  | Genereller Gesundheitsstatus, relevante Vorerkrankungen, Interventionen und Operationen  Spezifische Organerkrankungen (Lunge, endokrinologisch, Niere, Leber, Gehirn, muskulär)  Vorbefunde (Bildgebung, Labor, Histologie, etc.)   - Unfallanamnese (ungeklärt) |
| Medikation | Verschrieben/Nicht-rezeptiert, Einnahme chronisch/im Umfeld des Todeszeitpunktes;  Dosis, Applikation, Indikation, Verträglichkeit (soweit eruierbar), Änderungen  Insb. Antiarrhythmika, QT-Medikamente, Interaktionen |
| **Kardiovaskuläre Anamnese** |  | - Kardiovaskuläre Parameter - Kardiovaskuläre Erkrankungen, Interventionen und Operationen - Potentiell erbliche Herz-, Gefäß- und Klappenerkrankungen - Synkope, Angina pectoris, Dyspnoe, Arrhythmie - Ereignistrigger (physisch, emotional, Ruhe, unspezifisch) - Gefäßrisikofaktoren |
| **Familienanamnese** | Todesfälle, ungeklärte Unfälle | - Plötzliche Herztode (SCD, SCA, SIDS), Aborte |
| Aufzeichnung eines Familien-Stammbaumes | - Kennzeichnung von weiteren, möglichen Betroffenen, Nachvollziehbarkeit der Erblichkeit der Erkrankung |
| Kardiovaskuläre Erkrankungen | - KHK/Myokardinfarkt, Herzinsuffizienz, Kardiomyopathien, angeborene Herz- und Klappenfehler (z.B. MVP, Marfan-Syndrom), erbliche Arrhythmie-Formen - ICD-/SM-Träger |
| Neuromuskuläre  oder Stoffwechsel- Erkrankungen | z.B. syndromale oder andere, erbliche Erkrankungen, Epilepsie,  Hormonstörungen, Diabetes, Hypercholesterinämie, Lp(a) |

**Zusätzliche Tabelle 3: Empfehlungen für klinische Untersuchungen (*: optional) bei**

**biologisch verwandten Familienmitgliedern nach unklarem Todesfall unter 40 Jahren**

(modifiziert nach (Wilms et al., 2012))

|  |  | **Kommentar** |
| --- | --- | --- |
| **Anamnese** | Persönliche Anamnese | kardial/nicht-kardial |
| **Körperliche Untersuchung** | Generell | Focus kardiopulmonal, vaskulär |
| Spezifisch (*) | Syndrom-Zeichen (Skelett, Haut, Facies, …) |
| **Technische Zusatzuntersuchungen** | Ruhe-EKG | Papiergeschwindigkeit 50 mm/s,  Ableitung V1/V2 im 2. ICR (*); Rhythmusstreifen über 5 - 10 min (*) |
| Belastungs-EKG | (Papiergeschwindigkeit 50 mm/s) |
| Langzeit-EKG | Ggf. Event-Recorder (extern/implantiert) |
| Implantat-Patienten (*) (ICD, SM, etc.) | Eruierung der Indikation, Aggregatabfragen (ICD/SM) |
| Spezial-EKGs (*) | Spätpotential-EKG |
| Vektorkardiogramm |
| Medikamenten-Testung,  z.B. Ajmalin-Test |
| Invasive elektrophysiologische Untersuchung (EPU) (*) | Je nach Indikation |
| **Bildgebung** | Echokardiographie | Ggf. Stress-TTE, Strain-TTE, 3D, TTE (*) etc. |
| Magnetresonanztomographie (MRT) (*) | Inkl. Gadolinium-Gabe,  ggf. Stress-MRT, Aortendarstellung |
| Invasive Herzkatheter-untersuchung (*) | Hämodynamik, Laevo-/Dextro-ventrikulographie, Koronarangiographie |
| Koronare / Pulmonale Computertomographie (*) |  |
| **Labor** | Serum (*) | z.B. Nüchtern-Cholesterin, Lp(a) |
| Molekulargenetische Untersuchung (*) | Je nach Erkrankung/Indikations-empfehlung |
